# Supplementary material for: A Naturally Derived Small Molecule Disrupts Ligand-Dependent and Ligand-Independent Androgen Receptor Signaling in Human Prostate Cancer Cells
Source: Oxford University Press journal article supplement (doi:10.1158/1535-7163.mct-13-0478), 2013-11-20
Supplement: 15357163mct130478-sup-fig6.pdf [file 15357163mct130478-sup-fig6.pdf]

## Effect of mahanine on growth of non-tumorigenic and tumorigenic prostate epithelial cells

A

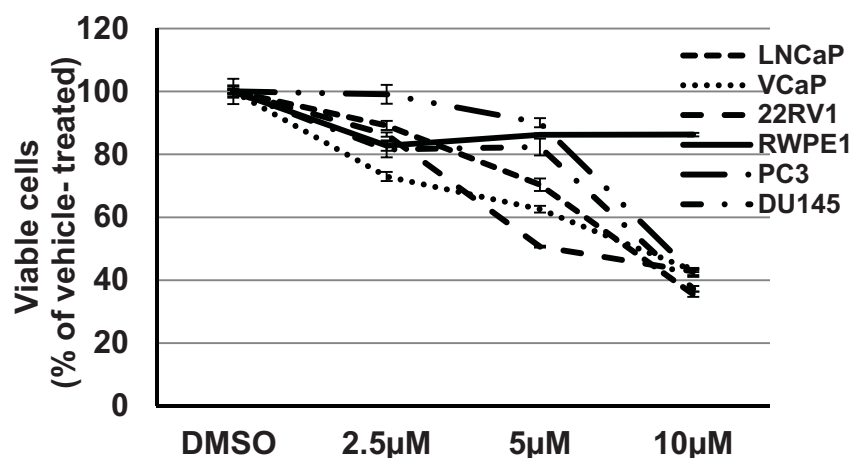

B

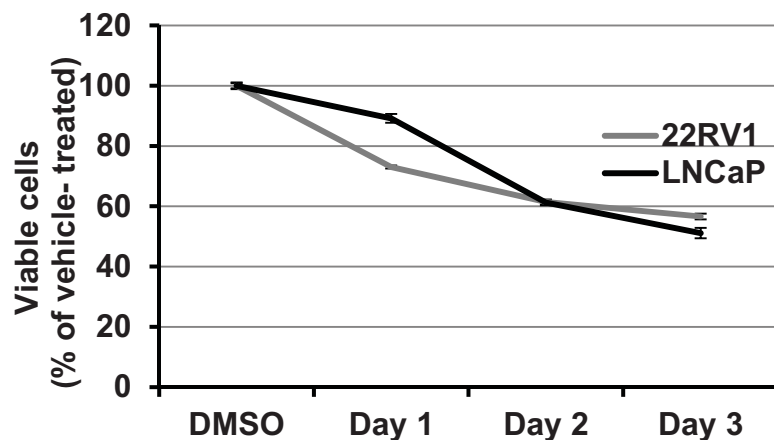

**Supplementary Figure 6:** (A) A panel of cells (LNCaP, VCaP, 22Rv1, PC3, DU145 and RWPE-1) were treated with the indicated concentrations of mahanine for 3 days. MTT assay was conducted to assess cell viability. The viability of control cells was set at 100%. Columns, mean of three independent experiments with quadruplicate samples; bars, SEM. (B) LNCaP and 22Rv1 cells were treated with mahanine (10μM) for 1-3 days. Cell viability was measured by the MTT assay. The viability of control cells was set at 100%. Columns, mean of three independent experiments with quadruplicate samples; bars, SEM.
